# Supplementary material
Source: PubMed Central journal article supplement (PMC4828316)

**Table S1. Primer and probe information for genes of interest.**

| <b>Gene</b>               | <b>Classification</b>        | <b>Accession No.<sup>1</sup></b> | <b>Assay ID<sup>2</sup></b> |
|---------------------------|------------------------------|----------------------------------|-----------------------------|
| <i>BDNF</i>               | Neurotrophic factor          | NM_214259                        | Ss03822335_s1               |
| <i>GAPDH</i>              | Reference                    | NM_001206359                     | Ss03374854_g1               |
| <i>TLR3</i>               | Pattern recognition receptor | NM_001097444                     | Ss03388861_m1               |
| <i>TLR4</i>               | Pattern recognition receptor | NM_001113039                     | Ss03389780_m1               |
| <i>PRRSV</i> <sup>3</sup> | Virus                        | NA                               | NA                          |

<sup>1</sup>NCBI GenBank accession number.

<sup>2</sup>Applied Biosystems TaqMan Gene Expression Assay identification number.

<sup>3</sup>*PRRSV* custom probe (Chen et al., 2009): forward primer, CGCACCAGATGGGACCTACTT; reverse primer, ACGGTGTTTCAGTGAGGGCTTT; probe, CGCTGCGTTGACTGG

**Figure S1. PRRSV infection significantly up-regulated expression of gene clusters encoding complement components (A), MHC-I and MHC-II isomers (B), and interferon induce proteins (C, FDR < 0.05).**

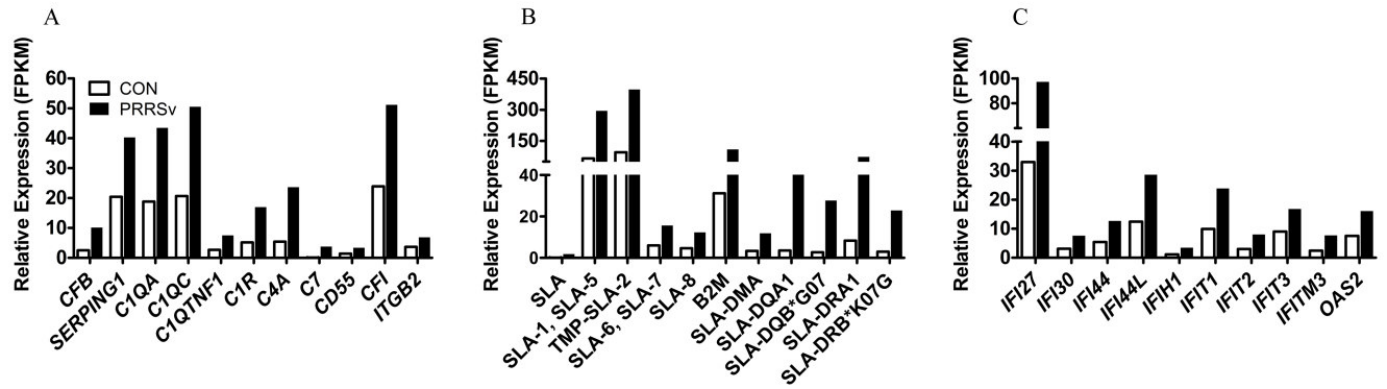

**Figure S2. PRRSV infection altered the fractional composition and increased MHC-II expression of all subpopulations of CD11b+ that varied in expression levels of CD45 and/or forward scatter pattern (FSC-A).** (A) Representative density plots characterized the fractions of CD11b+ cells based on expression level of CD45 and FSC-A. Two new fractions were observed for PRRSV cells with high FSC-A and intermediate or high expression of CD45. (B) Percentage of CD45<sup>low</sup>, intermediate, and high fractions in CD11b+ cells isolated from hippocampus of PRRSV (n=6) or control (n=6) piglets. Statistical analysis, one-way ANOVA, \* P < 0.05. (C) Representative contour plot showing percentage of MHC-II+ populations from CD45<sup>low</sup>, intermediate, high and new fractions, respectively, in CON and PRRSV.

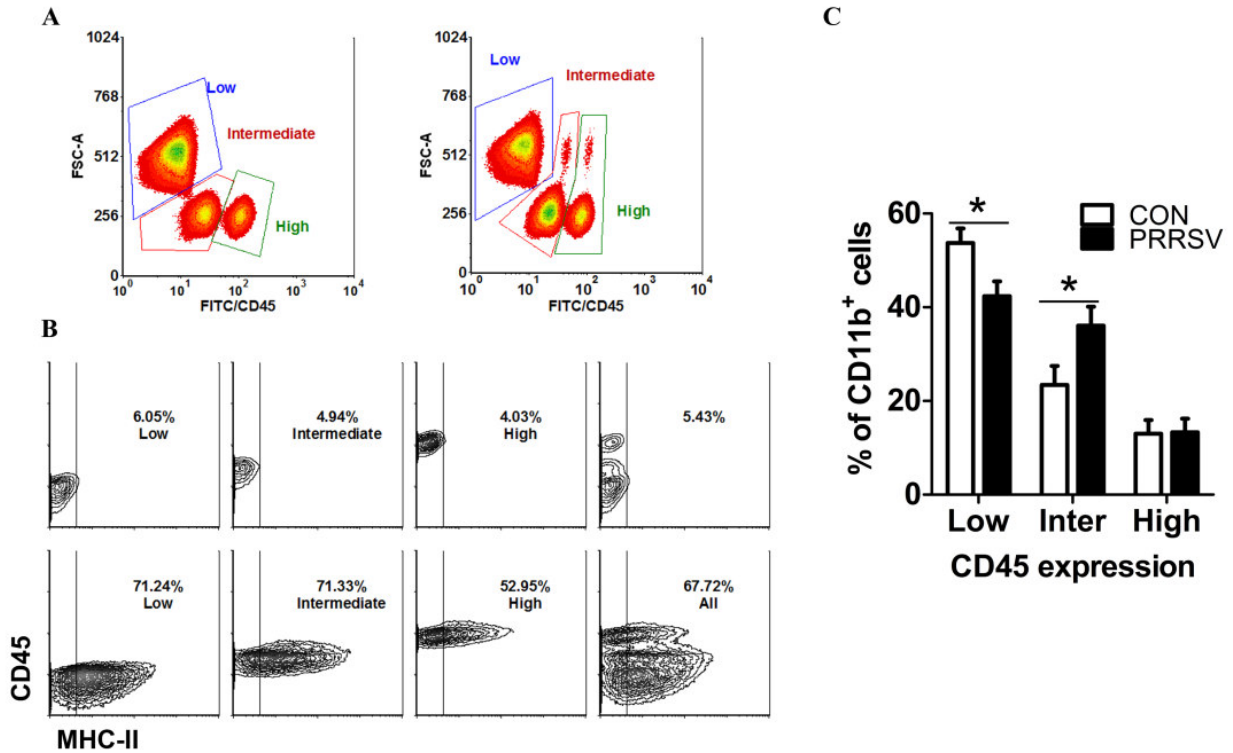

Supplement: NIHMS763982-supplement-01.pdf [file NIHMS763982-supplement-01.pdf]
